# Supplementary material for: Candidate-gene based GWAS identifies reproducible DNA markers for metabolic pyrethroid resistance from standing genetic variation in East African Anopheles gambiae
Source: PubMed Central journal article supplement (PMC5811533; doi:10.1038/s41598-018-21265-5), 2018-02-13
Supplement: 41598_2018_21265_MOESM1_ESM.pdf [file 41598_2018_21265_MOESM1_ESM.pdf]

**Candidate-gene based GWAS identifies reproducible DNA markers for metabolic pyrethroid resistance from standing genetic variation in East African *Anopheles gambiae***

David Weetman<sup>1†</sup>\*, Craig S. Wilding<sup>2†</sup>, Daniel E. Neafsey<sup>3</sup>, Pie Müller<sup>1,4,5</sup>, Eric Ochomo<sup>6,7</sup>, Alison T. Isaacs<sup>1</sup>, Keith Steen<sup>1</sup>, Emily J. Rippon<sup>1</sup>, John C. Morgan<sup>1</sup>, Henry D. Mawejje<sup>8</sup>, Daniel J. Rigden<sup>9</sup>, Loyce M. Okedi<sup>10</sup> and Martin J. Donnelly<sup>1,11</sup>

## Supplementary Figures

Please see Supplementary information Excel file for Tables S1-S7

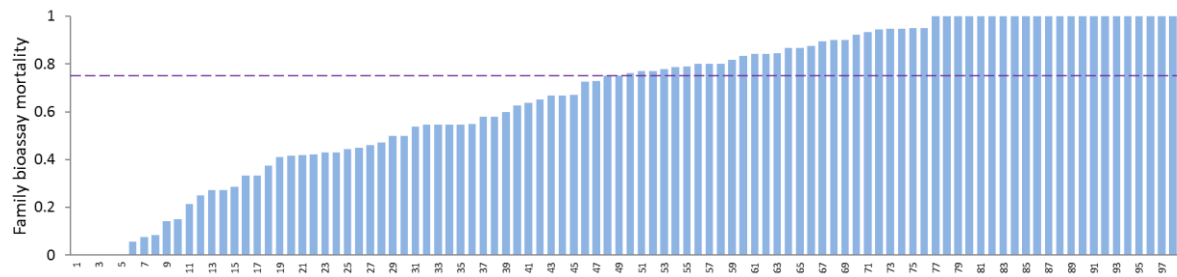

**Figure S1.** Range of family bioassay mortalities 24 h after a 75 min WHO tube exposure to permethrin. The dashed line shows the median value.

### NaLIRRI insectary

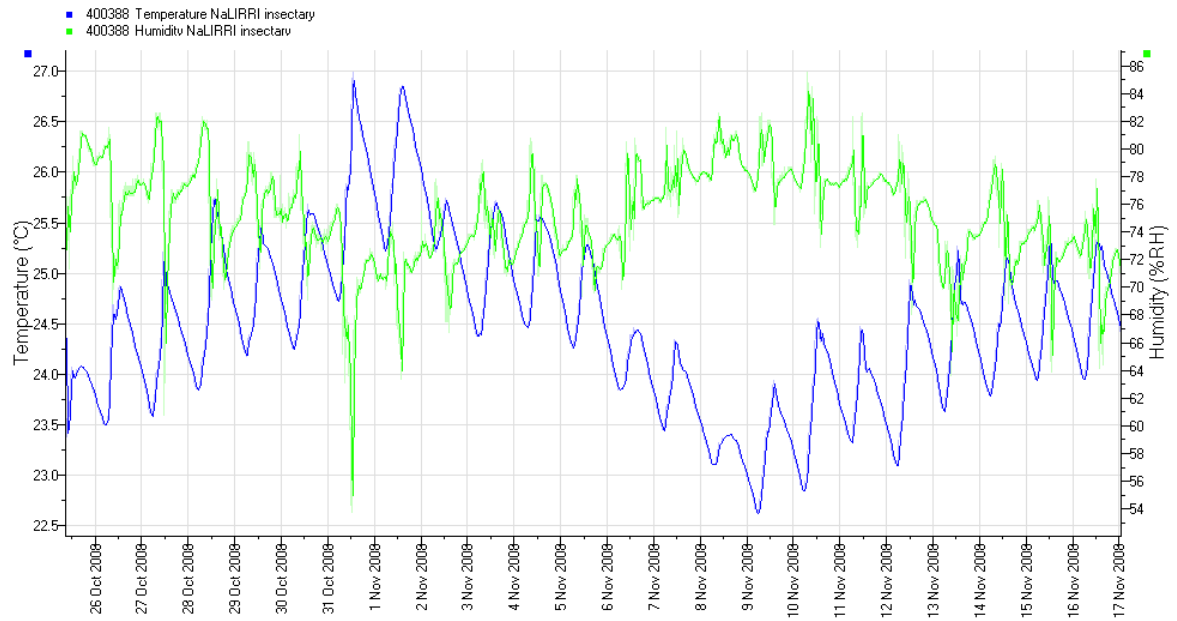

**Figure S2.** Temperature (blue line) and humidity (green line) variation in the field insectary across the study period (26<sup>th</sup> October to 17<sup>th</sup> November)

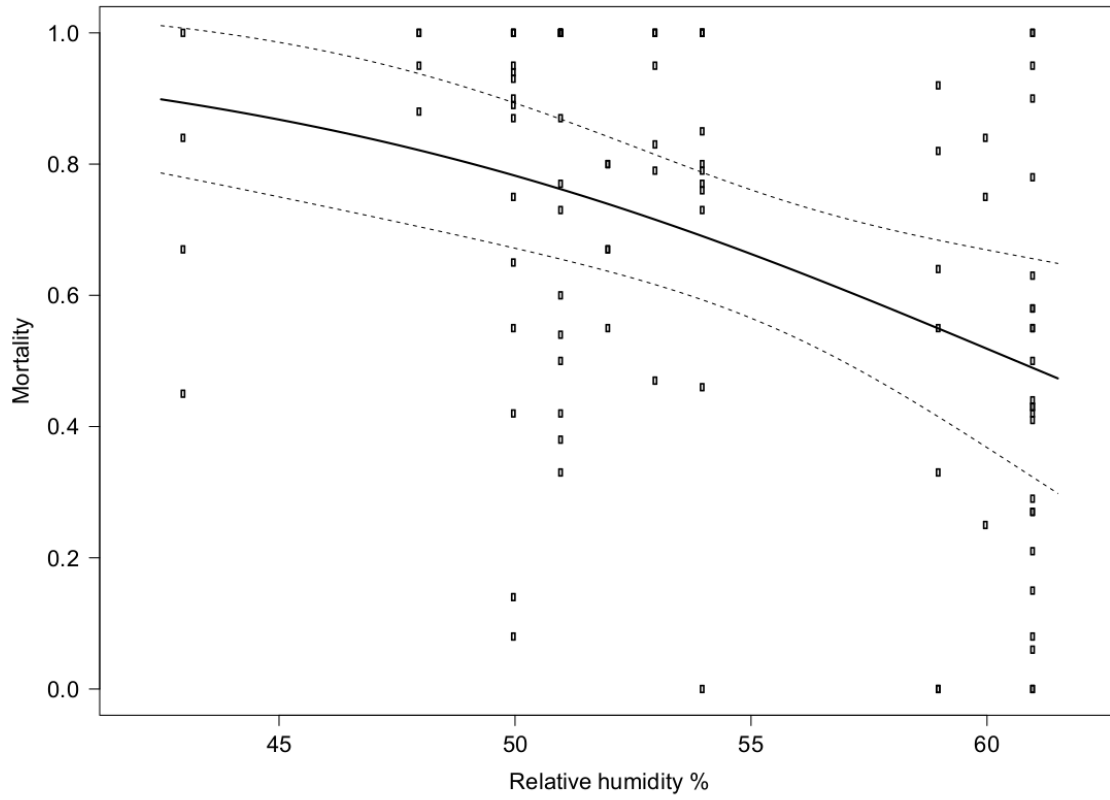

**Figure S3.** Logistic regression plot (with 95% confidence intervals) illustrating the impact of humidity on family mortality (each point is a family bioassay result).

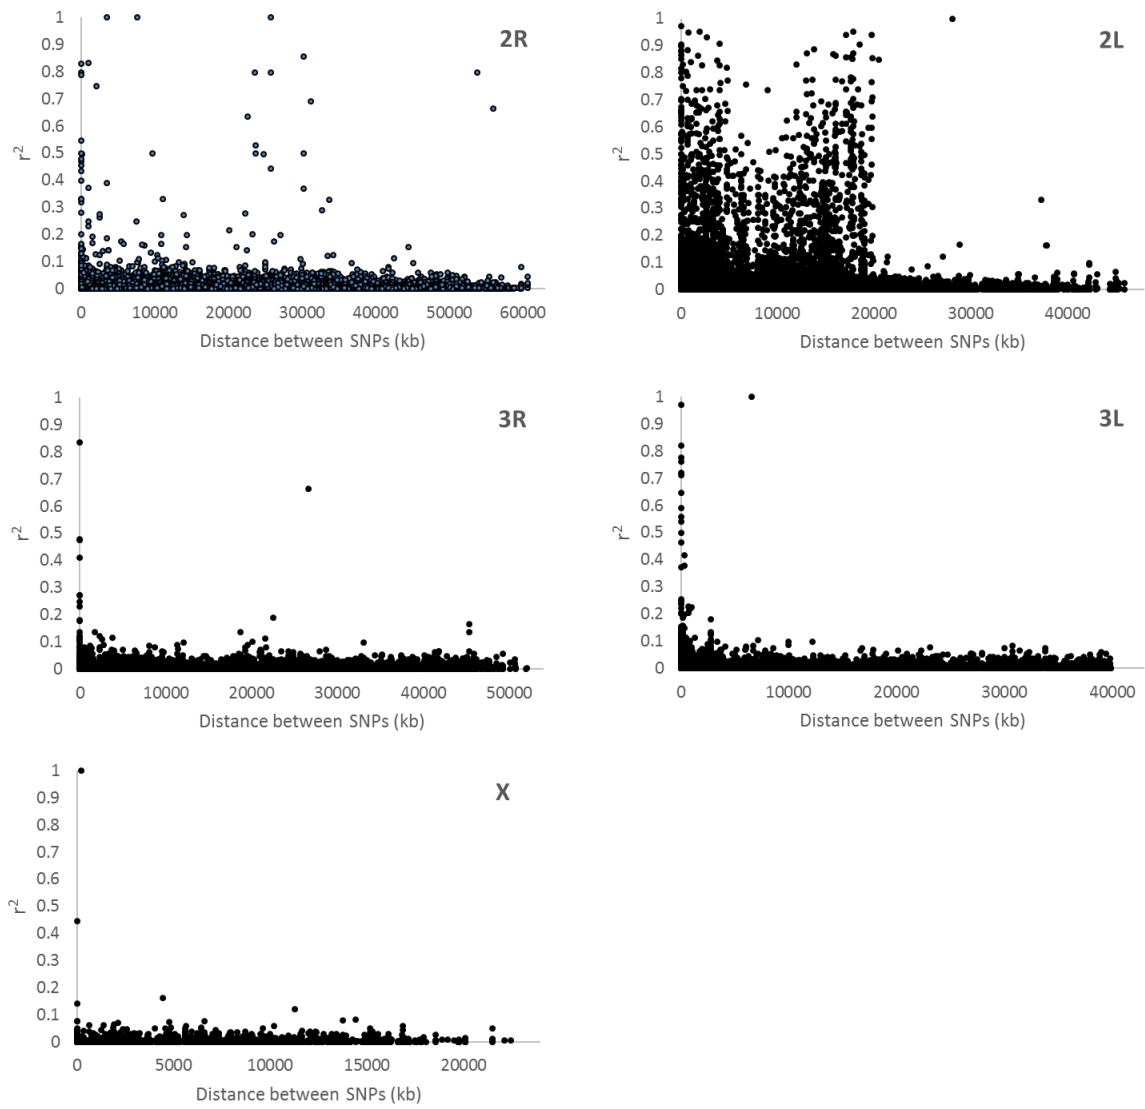

**Figure S4.** Decay of linkage disequilibrium (measured by  $r^2$ ) between SNPs at varying pairwise distances on each chromosome.

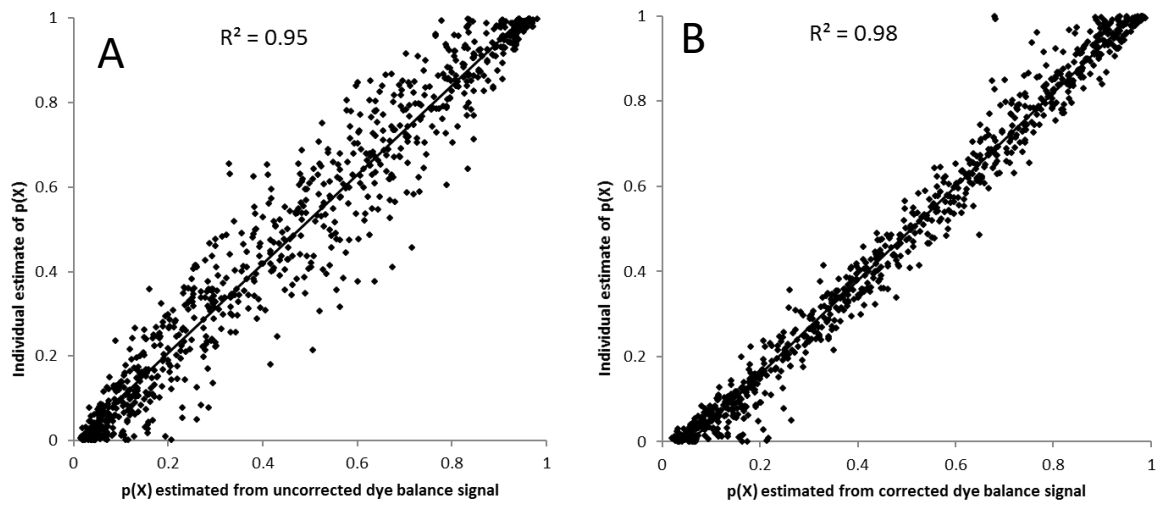

**Figure S5.** Prediction of population allele frequencies,  $p(X)$ , obtained from individual genotyping by estimates from pooled genotyping (A) before and (B) after correction for dye bias using the dye-balance signal from heterozygotes

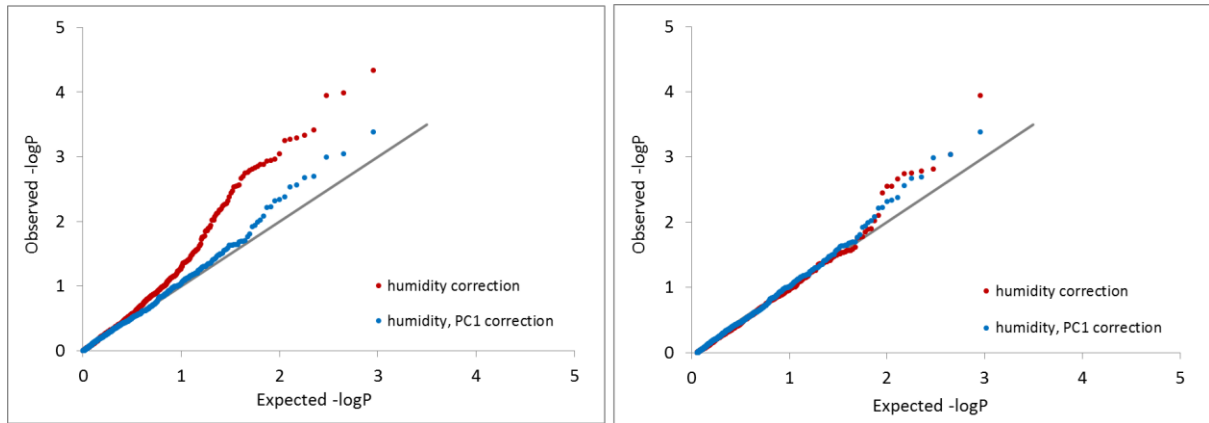

**Figure S6.** Observed vs. expected  $-\log$  probability plots with and without statistical correction for the principal component reflecting stratification, PC1. (A) all SNPs (B) excluding SNPs from within the 2La inversion region.

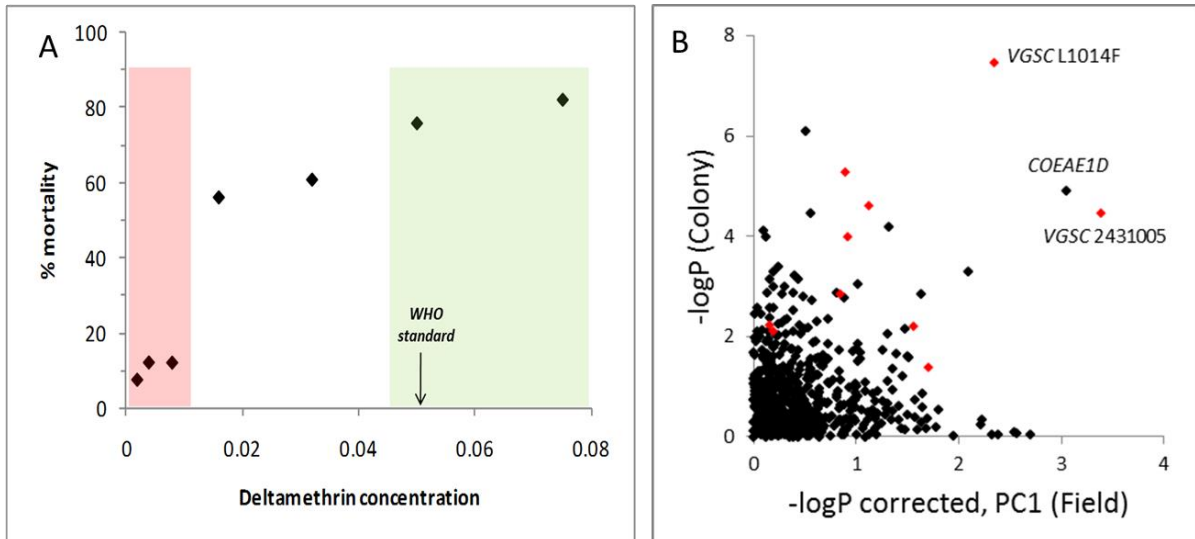

**Figure S7.** Association analysis in a colony founded from Tororo eggs. (A) Dose-response assay from which resistant (green shading) and susceptible (pink shading) females were chosen for association analysis. (B) Comparison of association test results from permethrin-bioassayed field and deltamethrin-bioassayed colony samples. Red points show SNPs in the *Vgsc* target site gene.



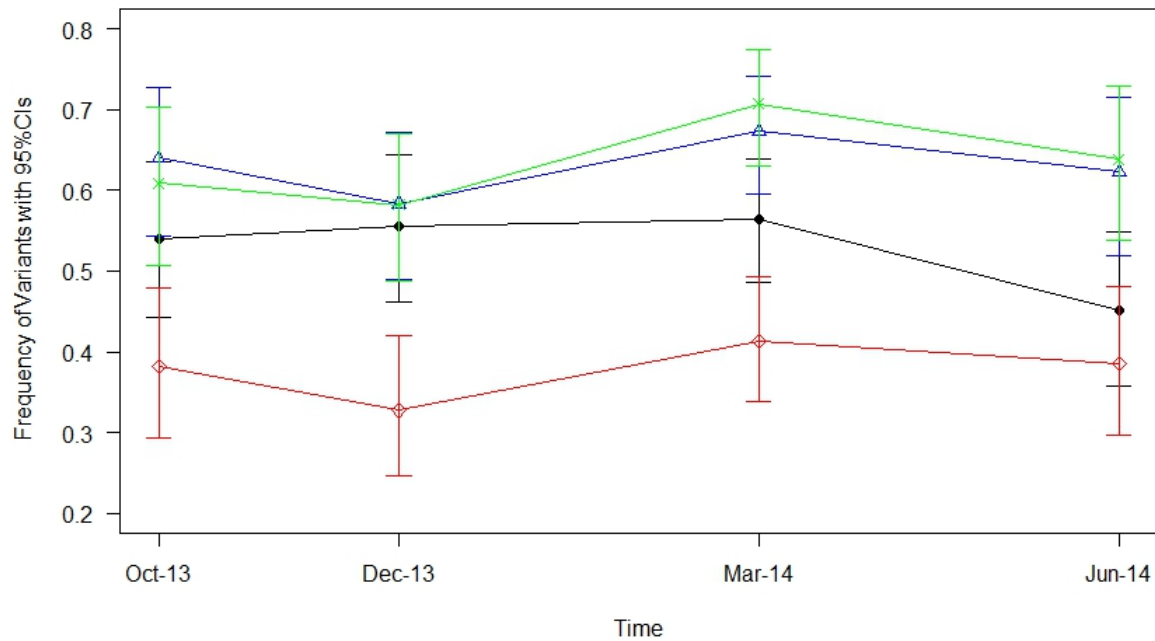

**Figure S8.** Temporal variation in mean allele frequencies in females (N=237) collected in Nagongera, Tororo in 2013-14, with 95% confidence intervals. Despite apparent covariation in frequencies *CYP4J5* marker genotypes were uncorrelated with 2La variation (Table S5) and *CYP4J10* only marginally. *Coeae1d*, black; *Cyp4j5*, blue; *Cyp4j10*, red; 2La (wild type), green.

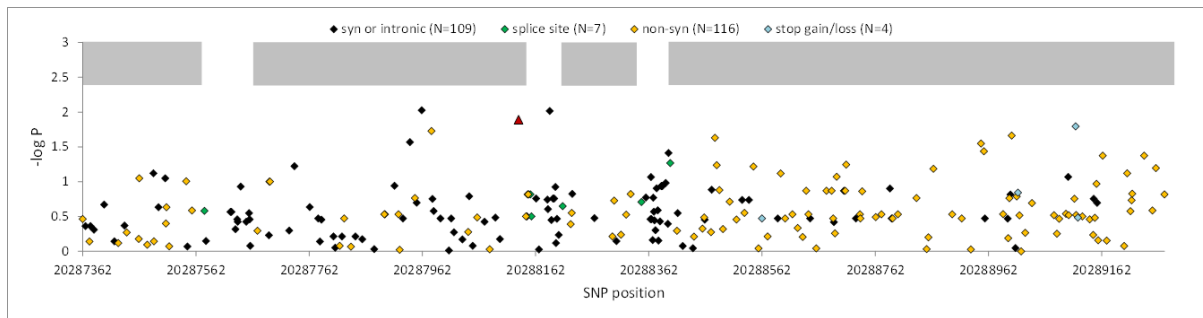

**Figure S9.** Association analysis of sequence variants in the *Coeae1d* gene. Each point, coloured according to the consequences of a variant at the position (legend), shows a  $\chi^2$  association test  $-\log P$  value for each polymorphic position comparing individuals from resistant and susceptible families (N=24 each), chosen from the extremes of the mortality distribution (see Table S6b for details). Shaded blocks show positions of exons. The associated SNP (20288132) originally identified is shown as a red triangle.
